# Supplementary material for: A Flexible and Transparent PtNP/SWCNT/PET Electrochemical Sensor for Nonenzymatic Detection of Hydrogen Peroxide Released from Living Cells with Real-Time Monitoring Capability
Source: MDPI journal article supplement (doi:10.3390/bios13070704), 2023-07-03
Supplement: s1 [file s1]

# A Flexible and Transparent PtNP/SWCNT/PET Electrochemical Sensor for Nonenzymatic Detection of Hydrogen Peroxide Released from Living Cells with Real-Time Monitoring Capability

Da Eun Oh <sup>1,†</sup>, Chang-Seuk Lee <sup>2,†</sup>, Tae Wan Kim <sup>3</sup>, Seob Jeon <sup>4</sup> and Tae Hyun Kim <sup>1,\*</sup>

<sup>1</sup> Department of Chemistry, Soonchunhyang University, Asan 31538, Republic of Korea

<sup>2</sup> Department of Chemistry, Seoul Woman's University, Seoul 01797, Republic of Korea

<sup>3</sup> Department of Medical Life Science, Soonchunhyang University, Asan 31538, Republic of Korea

<sup>4</sup> Department of Obstetrics and Gynecology, College of Medicine, Soonchunhyang University Cheonan Hospital, Cheonan 31151, Republic of Korea

\* Correspondence: thkim@sch.ac.kr

† These authors contributed equally to this work.

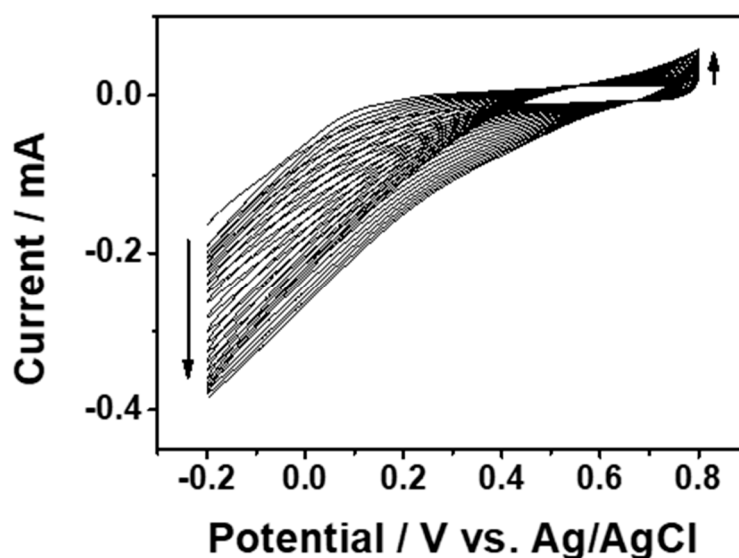

**Figure S1.** CV curves of SWCNT/PET film electrode in 1 mg/mL chloroplatinic acid hexahydrate at a scan rate of 50 mV for 20 cycles.

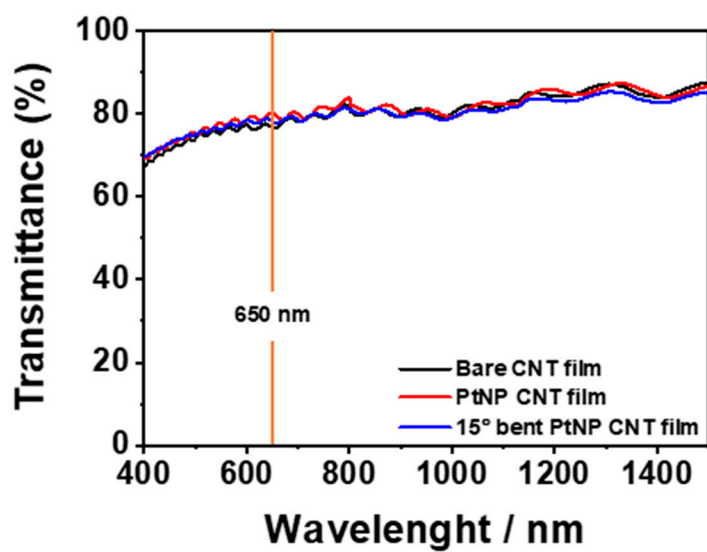

Figure S2. Transmittance of bare SWCNT, flat PtNP/SWCNT film, and bent PtNP/SWCNT film.

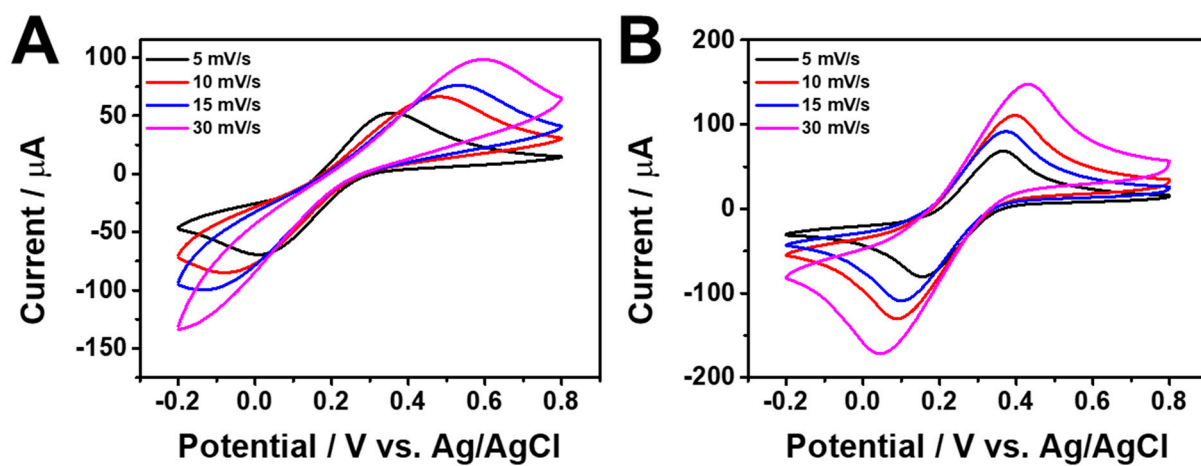

Figure S3. CV curve of (A) bare SWCNT and (B) PtNP/SWCNT film in 0.1 M KCl containing 10 mM  $[\text{Fe}(\text{CN})_6]^{3-}$  at a various scan rate.

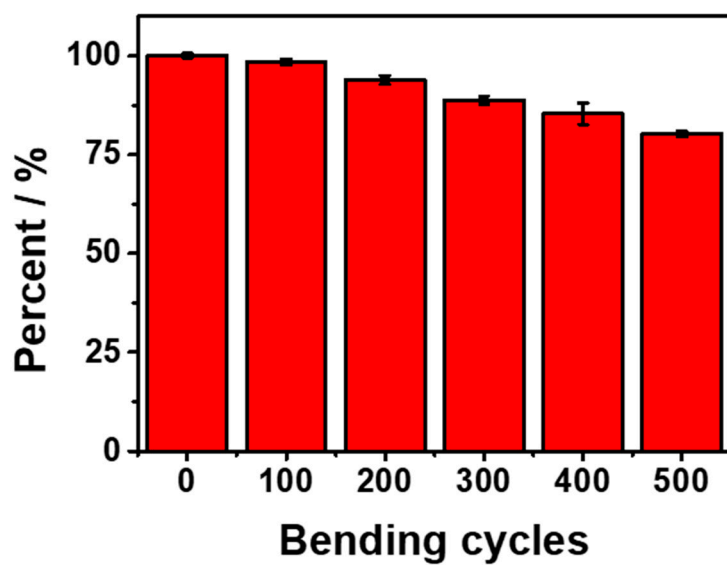

**Figure S4.** Effects of bending cycles on the current response to 100  $\mu\text{M}$   $\text{H}_2\text{O}_2$  using PtNP/SWCNT film bending at 60°.

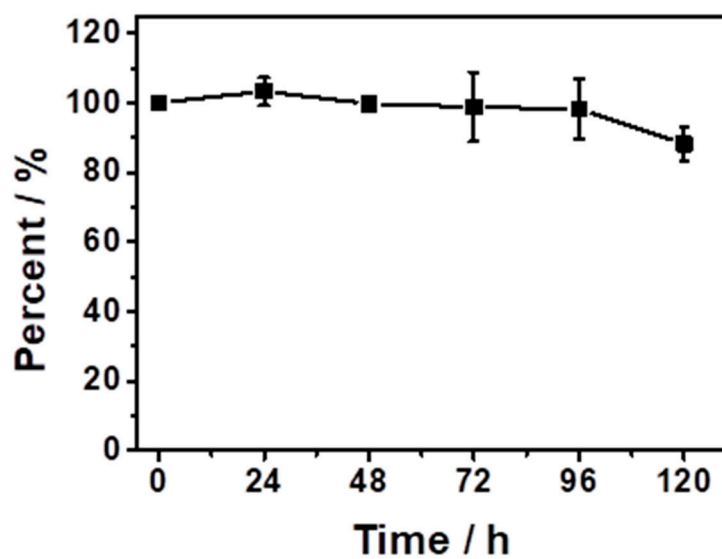

**Figure S5.** Stability of PtNP/SWCNT network film sensor in cell culture media without cells. Signals were compared from each amperometric response of 100  $\mu\text{M}$   $\text{H}_2\text{O}_2$  in 10 mM PBS.

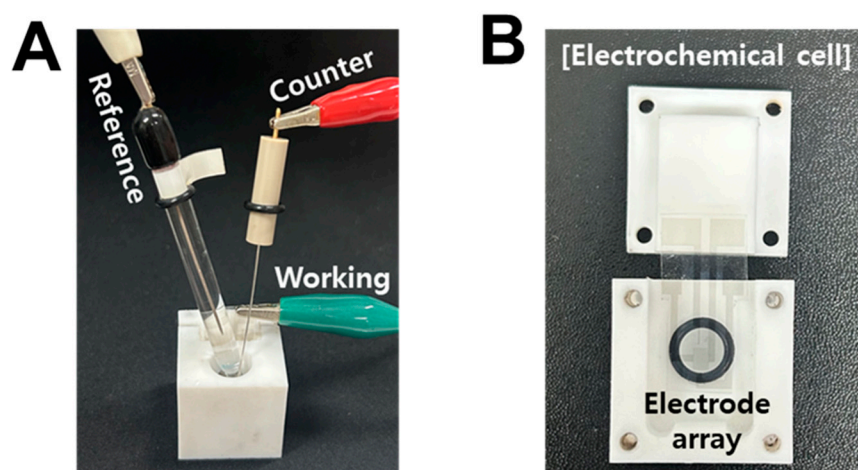

**Figure S6.** (A) Three-electrode setup includes the IDE as working electrodes. (B) Exploded view of the electrochemical cell.

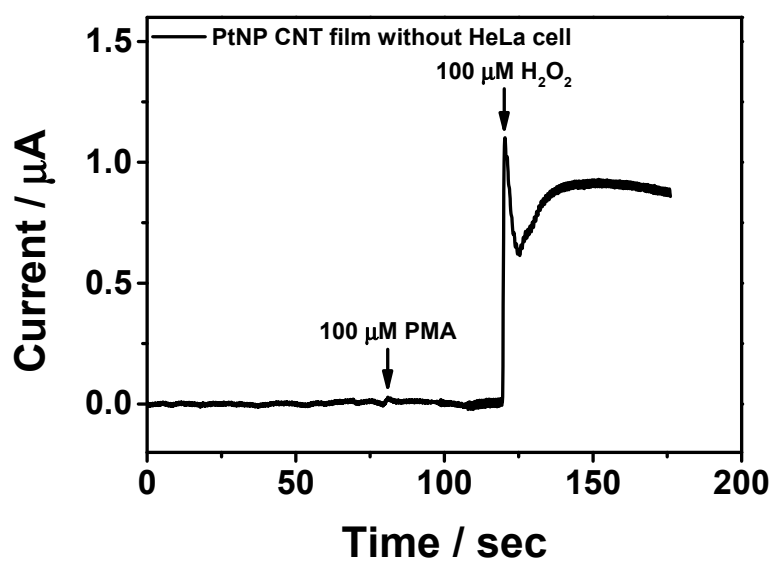

**Figure S7.** Monitoring of 100  $\mu\text{M}$  PMA and 100  $\mu\text{M}$   $\text{H}_2\text{O}_2$  using the flexible PtNP/SWCNT film without HeLa cell.
